# Supplementary material
Source: Springer Nature journal article supplement (https://www.springermedizin.de/resource/supplementary/40001_2014_148_MOESM1_ESM.pdf/9685306)

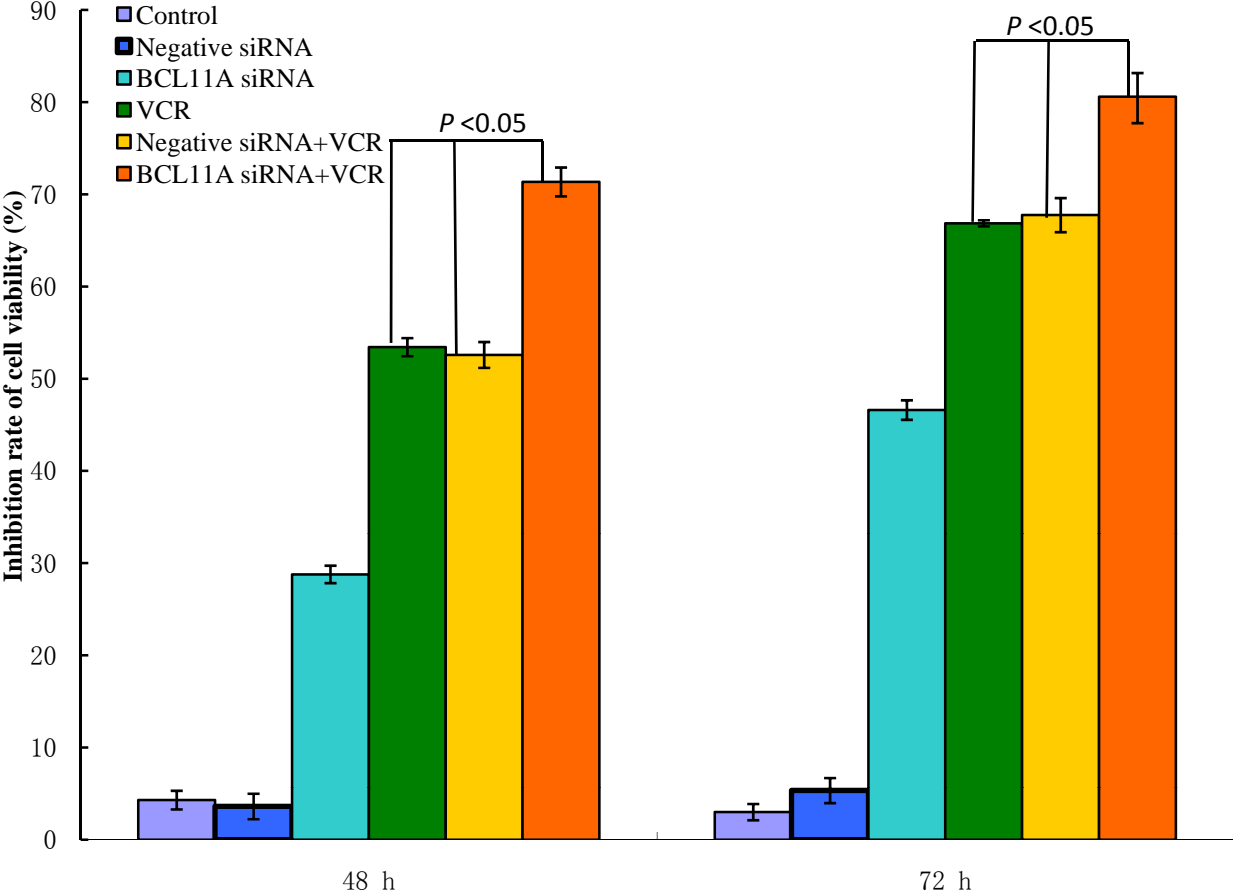

Supplement: MOESM1 [file 9685306]
